# Supplementary material for: Synergistic effect of dicarbollide anions in liquid–liquid extraction: a molecular dynamics study at the octanol–water interface
Source: Royal Society of Chemistry journal article supplement (doi:10.1039/b616753e), 2007-01-01
Supplement: b616753e.pdf [file b616753e.pdf]

| System                                                                                                                                       | N <sub>oil</sub> / N <sub>water</sub> | Time (ns) | Box size (Å <sup>3</sup> ) |
|----------------------------------------------------------------------------------------------------------------------------------------------|---------------------------------------|-----------|----------------------------|
| <b>NEAT OCTANOL</b>                                                                                                                          | 865 / 0                               | 2         | 61 x 61 x 61               |
| <b>OCTANOL – WATER INTERFACE</b>                                                                                                             |                                       |           |                            |
| Juxtaposed 50:50                                                                                                                             | 411 / 3361                            | 16        | 45 x 45 x 101              |
| Demixing 50:50                                                                                                                               | 411 / 3361                            | 15        | 45 x 45 x 100              |
| Demixing 50:50 (cubic box)                                                                                                                   | 411 / 3361                            | 15        | 59 x 59 x 59               |
| Demixing 90:10 (cubic box)                                                                                                                   | 788 / 723                             | 5         | 60 x 60 x 60               |
| Demixing 10:90 (cubic box)                                                                                                                   | 129 / 5940                            | 5         | 60 x 60 x 60               |
| <b>30 CCD<sup>-</sup> Cs<sup>+</sup> IONS IN OCTANOL</b>                                                                                     | 735                                   | 5         | 59 x 59 x 59               |
| <b>30 CCD<sup>-</sup> Cs<sup>+</sup> AT THE 50:50 MIXTURE</b>                                                                                |                                       |           |                            |
| Starting at the interface                                                                                                                    | 443 / 3918                            | 5         | 50 x 50 x 101              |
| Starting in oil                                                                                                                              | 332 / 4102                            | 10        | 49 x 49 x 98               |
| Starting in water                                                                                                                            | 500 / 3571                            | 14        | 51 x 51 x 101              |
| <b>30 CCD<sup>-</sup> Cs<sup>+</sup> AT THE 90:10 MIXTURE</b>                                                                                | 634 / 742                             | 5         | 59 x 59 x 59               |
| <b>30 CCD<sup>-</sup> 10 Eu<sup>3+</sup> AT THE 50:50 MIXTURE</b>                                                                            | 507 / 3517                            | 20        | 50 x 50 x 101              |
| <b>Eu(BTP)<sub>3</sub><sup>3+</sup> COMPLEX AT THE CHLOROFORM – WATER INTERFACE</b>                                                          |                                       |           |                            |
| Eu(BTP) <sub>3</sub> (NO <sub>3</sub> ) <sub>3</sub> + 3 CMPO + 3 CCD <sup>-</sup> , H <sub>3</sub> O <sup>+</sup>                           | 903 / 4010                            | 2         | 50 x 50 x 100              |
| Eu(BTP) <sub>3</sub> (NO <sub>3</sub> ) <sub>3</sub> + 12 BTP + 12 CMPO + 12 CCD <sup>-</sup> , H <sub>3</sub> O <sup>+</sup>                | 791 / 3697                            | 3.4       | 50 x 50 x 100              |
| <b>Eu(BTP)<sub>3</sub><sup>3+</sup> COMPLEX AT THE OCTANOL – WATER INTERFACE</b>                                                             |                                       |           |                            |
| Eu(BTP) <sub>3</sub> (NO <sub>3</sub> ) <sub>3</sub> + 3 CMPO + 3 CCD <sup>-</sup> , H <sub>3</sub> O <sup>+</sup>                           | 464 / 4008                            | 15        | 50 x 50 x 100              |
| Eu(BTP) <sub>3</sub> (NO <sub>3</sub> ) <sub>3</sub> + 12 CCD <sup>-</sup> , H <sub>3</sub> O <sup>+</sup>                                   | 445 / 3928                            | 15        | 50 x 50 x 99               |
| Eu(BTP) <sub>3</sub> (NO <sub>3</sub> ) <sub>3</sub> + 12 BTP + 12 CMPO                                                                      | 366 / 3712                            | 15        | 48 x 48 x 97               |
| Eu(BTP) <sub>3</sub> (NO <sub>3</sub> ) <sub>3</sub> + 12 BTP + 12 CMPO<br>DEMIX CUBIC                                                       | 368 / 3742                            | 15        | 61 x 61 x 61               |
| Eu(BTP) <sub>3</sub> (NO <sub>3</sub> ) <sub>3</sub> + 12 BTP + 12 CMPO + 12<br>CCD <sup>-</sup> , H <sub>3</sub> O <sup>+</sup>             | 367 / 3706                            | 15        | 49 x 49 x 98               |
| Eu(BTP) <sub>3</sub> (NO <sub>3</sub> ) <sub>3</sub> + 12 BTP + 12 CMPO + 12<br>CCD <sup>-</sup> , H <sub>3</sub> O <sup>+</sup> DEMIX       | 367 / 3706                            | 15        | 49 x 49 x 98               |
| Eu(BTP) <sub>3</sub> (NO <sub>3</sub> ) <sub>3</sub> + 12 BTP + 12 CMPO + 12<br>CCD <sup>-</sup> , H <sub>3</sub> O <sup>+</sup> DEMIX CUBIC | 336 / 3597                            | 15        | 61 x 61 x 61               |

**Table S1:** Characteristics of the simulated solutions: Number of solvent molecules, simulated time and box size.

|                                                                                | Cs <sup>+</sup> ...O <sub>oct</sub> | Cs <sup>+</sup> ...Cl <sub>CCD</sub> | Cs <sup>+</sup> ...Co <sub>CCD</sub> | Co...Cs <sup>+</sup>                | Co...H <sub>oct</sub> |
|--------------------------------------------------------------------------------|-------------------------------------|--------------------------------------|--------------------------------------|-------------------------------------|-----------------------|
| <b>30 Cs<sup>+</sup>, CCD<sup>-</sup> in octanol</b>                           |                                     |                                      |                                      |                                     |                       |
|                                                                                | 4.0                                 | 3.4                                  | 1.8                                  | 1.8                                 | 13.7                  |
|                                                                                | <i>3.1 ; 4.1</i>                    | <i>3.7 ; 5.6</i>                     | <i>6.9 ; 10.0</i>                    | <i>6.9 ; 10.0</i>                   | <i>id)</i>            |
| <hr/>                                                                          |                                     |                                      |                                      |                                     |                       |
|                                                                                | Cs <sup>+</sup> ...O <sub>oct</sub> | Cs <sup>+</sup> ...Cl <sub>CCD</sub> | Cs <sup>+</sup> ...Co <sub>CCD</sub> | Cs <sup>+</sup> ...O <sub>H2O</sub> |                       |
| <b>30 Cs<sup>+</sup>, CCD<sup>-</sup> in the 50:50 mixture</b>                 |                                     |                                      |                                      |                                     |                       |
| a)                                                                             | 0.8                                 | 1.7                                  |                                      | 5.9                                 |                       |
|                                                                                | <i>3.1 ; 4.1</i>                    | <i>3.8 ; 5.6</i>                     | <i>id)</i>                           | <i>3.1 ; 4.1</i>                    |                       |
| b)                                                                             | 2.0                                 | 2.4                                  | 1.5                                  | 3.4                                 |                       |
|                                                                                | <i>3.1 ; 4.1</i>                    | <i>3.8 ; 5.6</i>                     | <i>6.9 ; 9.6</i>                     | <i>3.1 ; 4.1</i>                    |                       |
| <hr/>                                                                          |                                     |                                      |                                      |                                     |                       |
| a)                                                                             | 1.2                                 | 1.3                                  | 0.9                                  | 5.8                                 |                       |
|                                                                                | <i>3.1 ; 4.2</i>                    | <i>3.8 ; 5.6</i>                     | <i>6.9 ; 10.0</i>                    | <i>3.1 ; 4.1</i>                    |                       |
| b)                                                                             | 2.7                                 | 2.8                                  | 1.7                                  | 2.3                                 |                       |
|                                                                                | <i>3.1 ; 4.2</i>                    | <i>3.8 ; 5.6</i>                     | <i>6.9 ; 10.0</i>                    | <i>3.1 ; 4.2</i>                    |                       |
| <hr/>                                                                          |                                     |                                      |                                      |                                     |                       |
| a)                                                                             | 0.9                                 | 0.8                                  | 0.8                                  | 6.6                                 |                       |
|                                                                                | <i>3.1 ; 4.0</i>                    | <i>3.8 ; 5.4</i>                     | <i>7.0 ; 9.9</i>                     | <i>3.2 ; 4.1</i>                    |                       |
| b)                                                                             | 3.1                                 | 1.1                                  | 0.8                                  | 3.3                                 |                       |
|                                                                                | <i>3.1 ; 4.1</i>                    | <i>3.8 ; 5.3</i>                     | <i>7.0 ; 10.3</i>                    | <i>3.1 ; 4.2</i>                    |                       |
| <hr/>                                                                          |                                     |                                      |                                      |                                     |                       |
| <b>30 Cs<sup>+</sup>, CCD<sup>-</sup> in the 90:10 mixture</b>                 |                                     |                                      |                                      |                                     |                       |
| a)                                                                             | 1.7                                 | 1.8                                  | 1.2                                  | 4.8                                 |                       |
|                                                                                | <i>3.1 ; 4.2</i>                    | <i>3.8 ; 5.6</i>                     | <i>6.9 ; 9.7</i>                     | <i>3.1 ; 4.1</i>                    |                       |
| <hr/>                                                                          |                                     |                                      |                                      |                                     |                       |
| <b>10 Eu<sup>3+</sup>, 30 CCD<sup>-</sup> at the octanol – water interface</b> |                                     |                                      |                                      |                                     |                       |
| a)                                                                             | 1.7                                 |                                      |                                      | 9.0                                 |                       |
|                                                                                | <i>4.7 ; 5.5</i>                    | <i>id)</i>                           | <i>id)</i>                           | <i>2.5 ; 3.2</i>                    |                       |
| b)                                                                             | 4.4                                 |                                      |                                      | 9.0                                 |                       |
|                                                                                | <i>4.7 ; 5.5</i>                    | <i>id)</i>                           | <i>id)</i>                           | <i>2.5 ; 3.2</i>                    |                       |

**Table S2:** Average coordination numbers of M<sup>n+</sup> cations and CCD<sup>-</sup> anions in neat octanol and in the octanol – water binary mixtures. They are obtained by integration of the first peaks of the RDF's whose maximum and integration distance are given in italics (*second line*). a) Averages over all Cs<sup>+</sup> or Eu<sup>3+</sup> ions. b) Averages over Cs<sup>+</sup> or Eu<sup>3+</sup> ions in the octanol phase. *id)* value not reported because the peak is ill-defined.

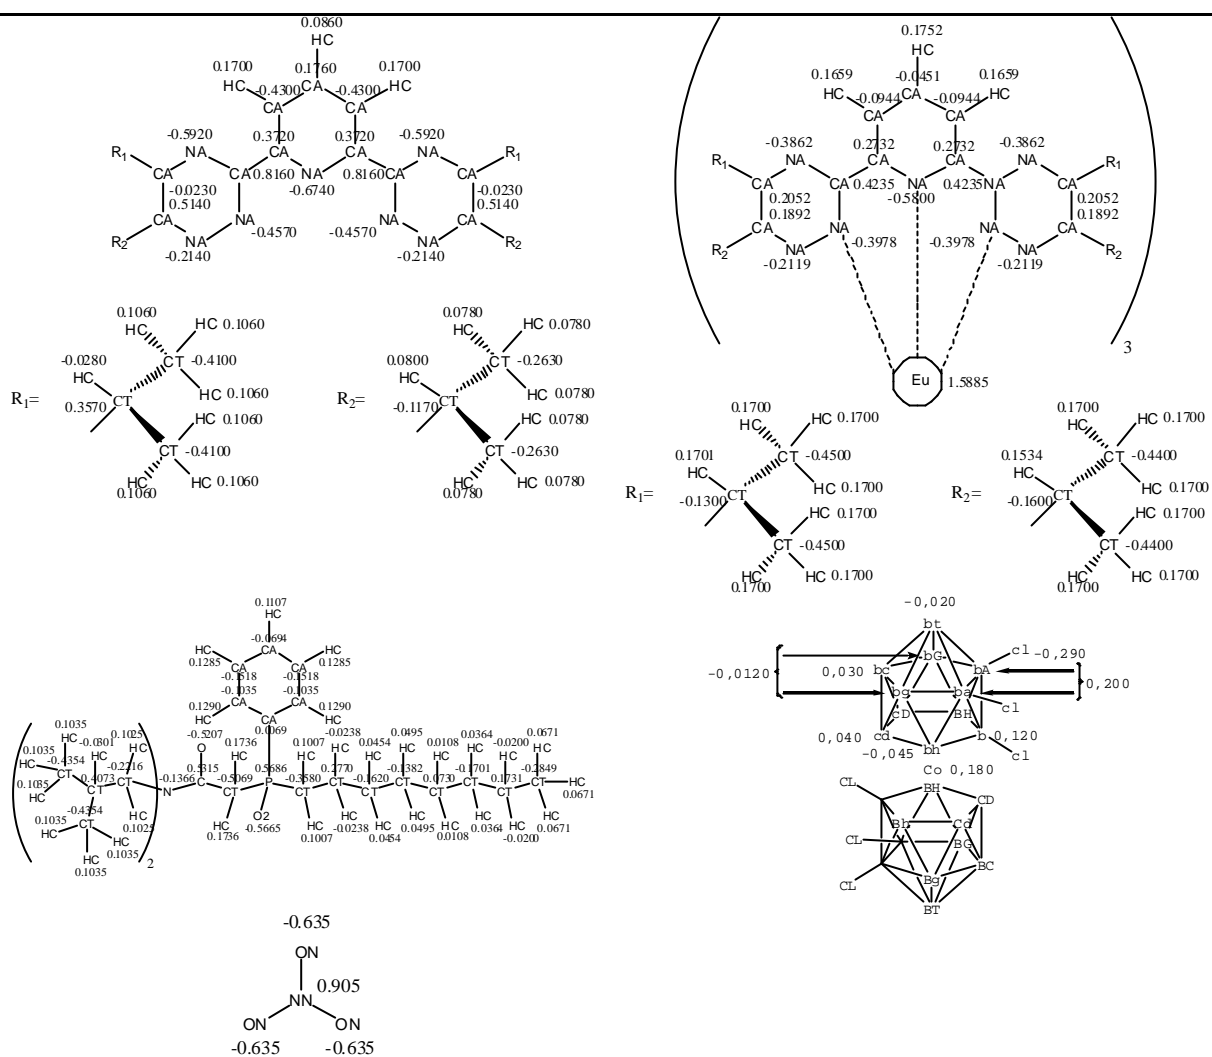

**Figure S1:** Atomic charges and AMBER atom types used to simulate the free BTP ligand, its  $\text{Eu}(\text{BTP})_3^{3+}$  complex, the CMPO ligand and the  $\text{NO}_3^-$  anion.

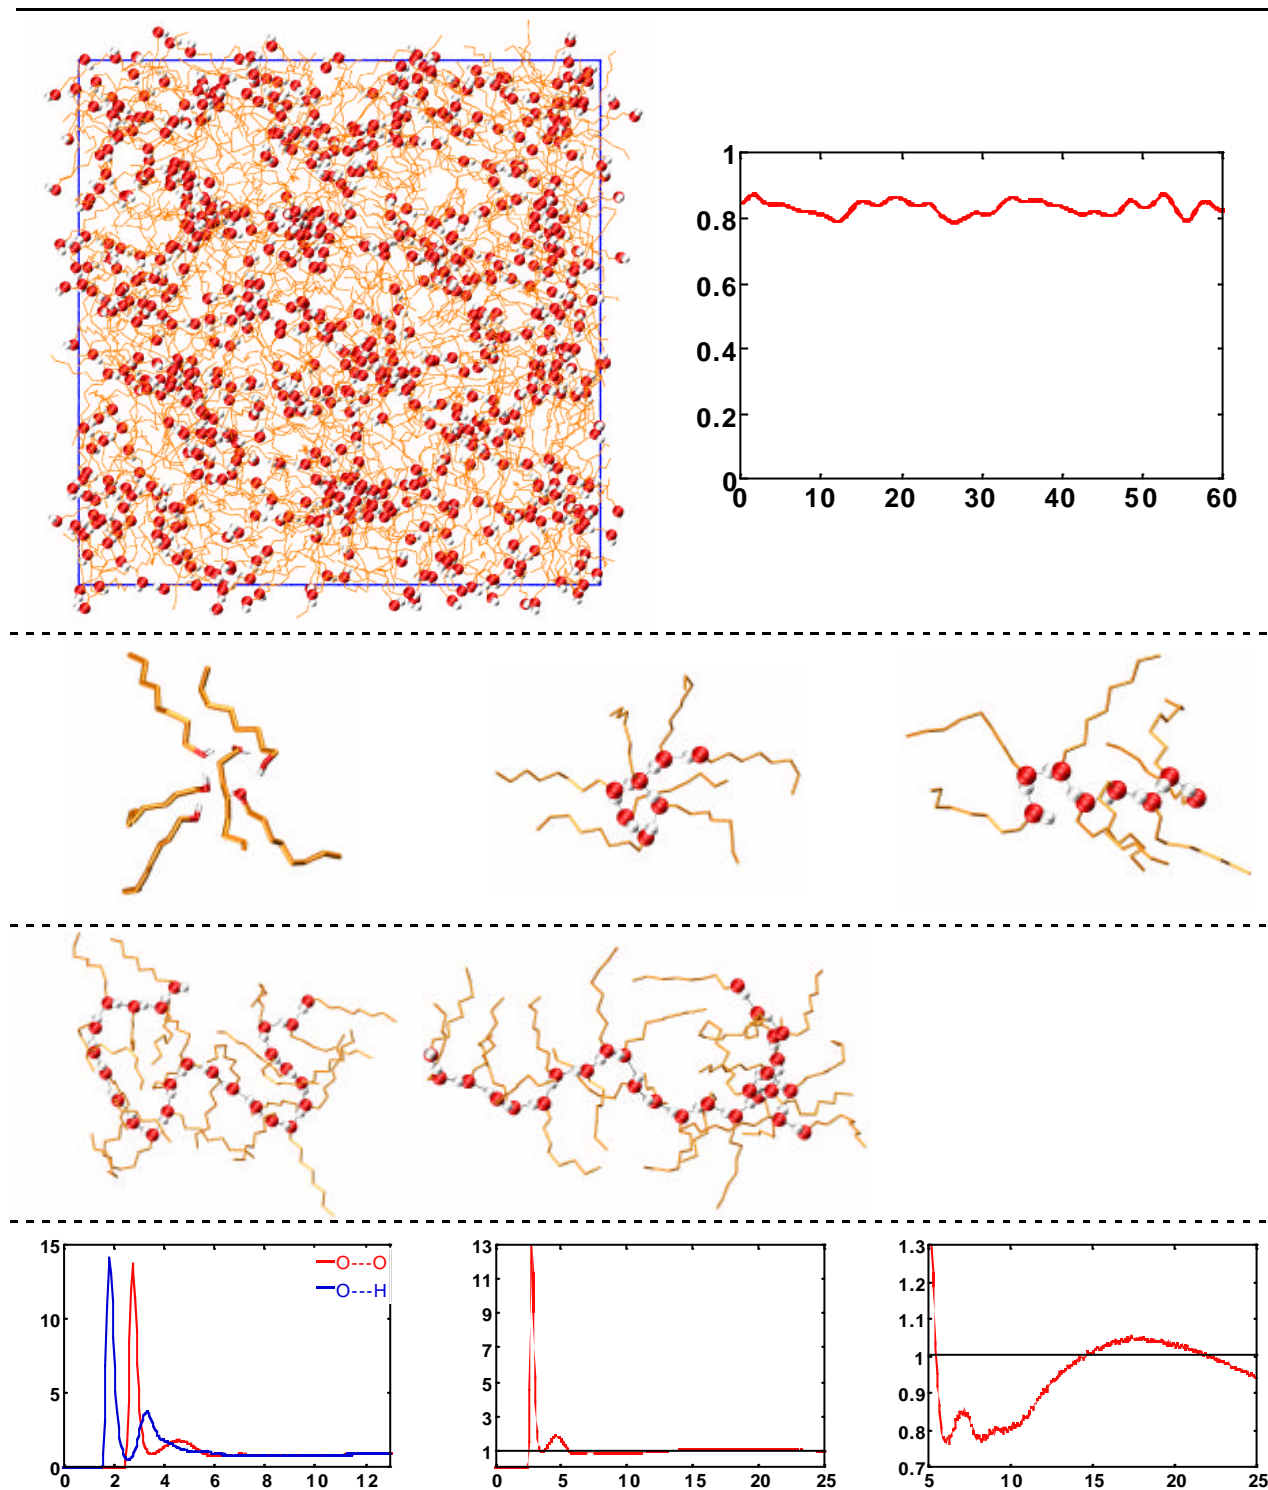

**Figure S2:** Neat octanol. Snapshot of the simulated box and density curve (*line 1*) and aggregates of 6, 7, 8, 25 and 27 molecules (*lines 2 and 3*), and RDF's (*line 4*: O...O in red, and H...O in blue). See also Debolt, S. E. and Kollman, P. A.; *J. Am. Chem. Soc.* **1995**, *117*, 5316; MacCallum, J. L. and Tieleman, D. P. *J. Am. Chem. Soc.* **2002**, *124*, 15093.

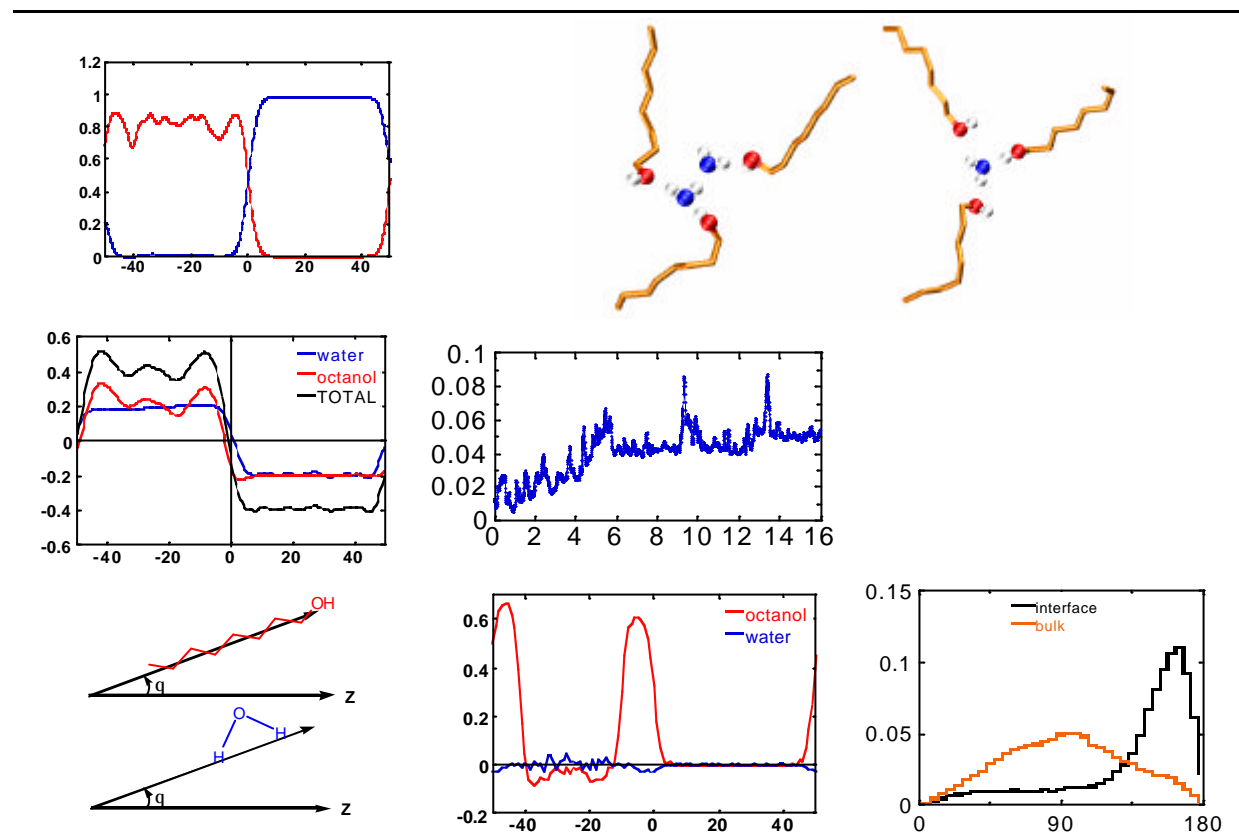

**Figure S3:** Octanol – water interface simulated from juxtaposed liquids. *First line:* average density curves and snapshots of a water monomer and dimer in the octanol phase. *Second line:* electrostatic potential  $\phi(z)$  (volts) and molar fraction of water in octanol as a function of time. *Third line:* order parameter of octanol molecules as a function of their z-position, and  $p(\theta)$  populations in bulk octanol and at the interface.

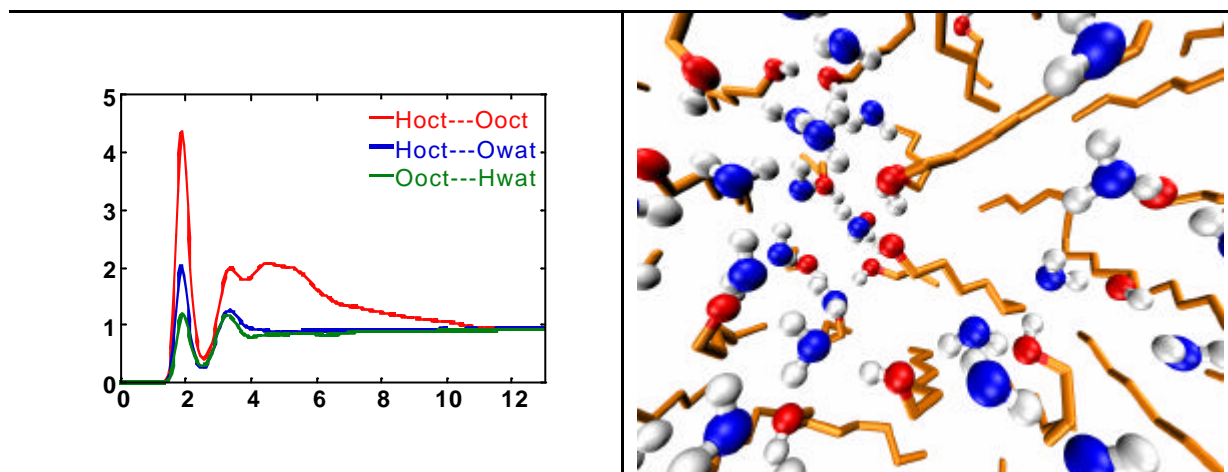

Figure S4: Solvation of octanol at the aqueous interface ( $z = \pm 5\text{\AA}$ ): RDF's and typical snapshot.

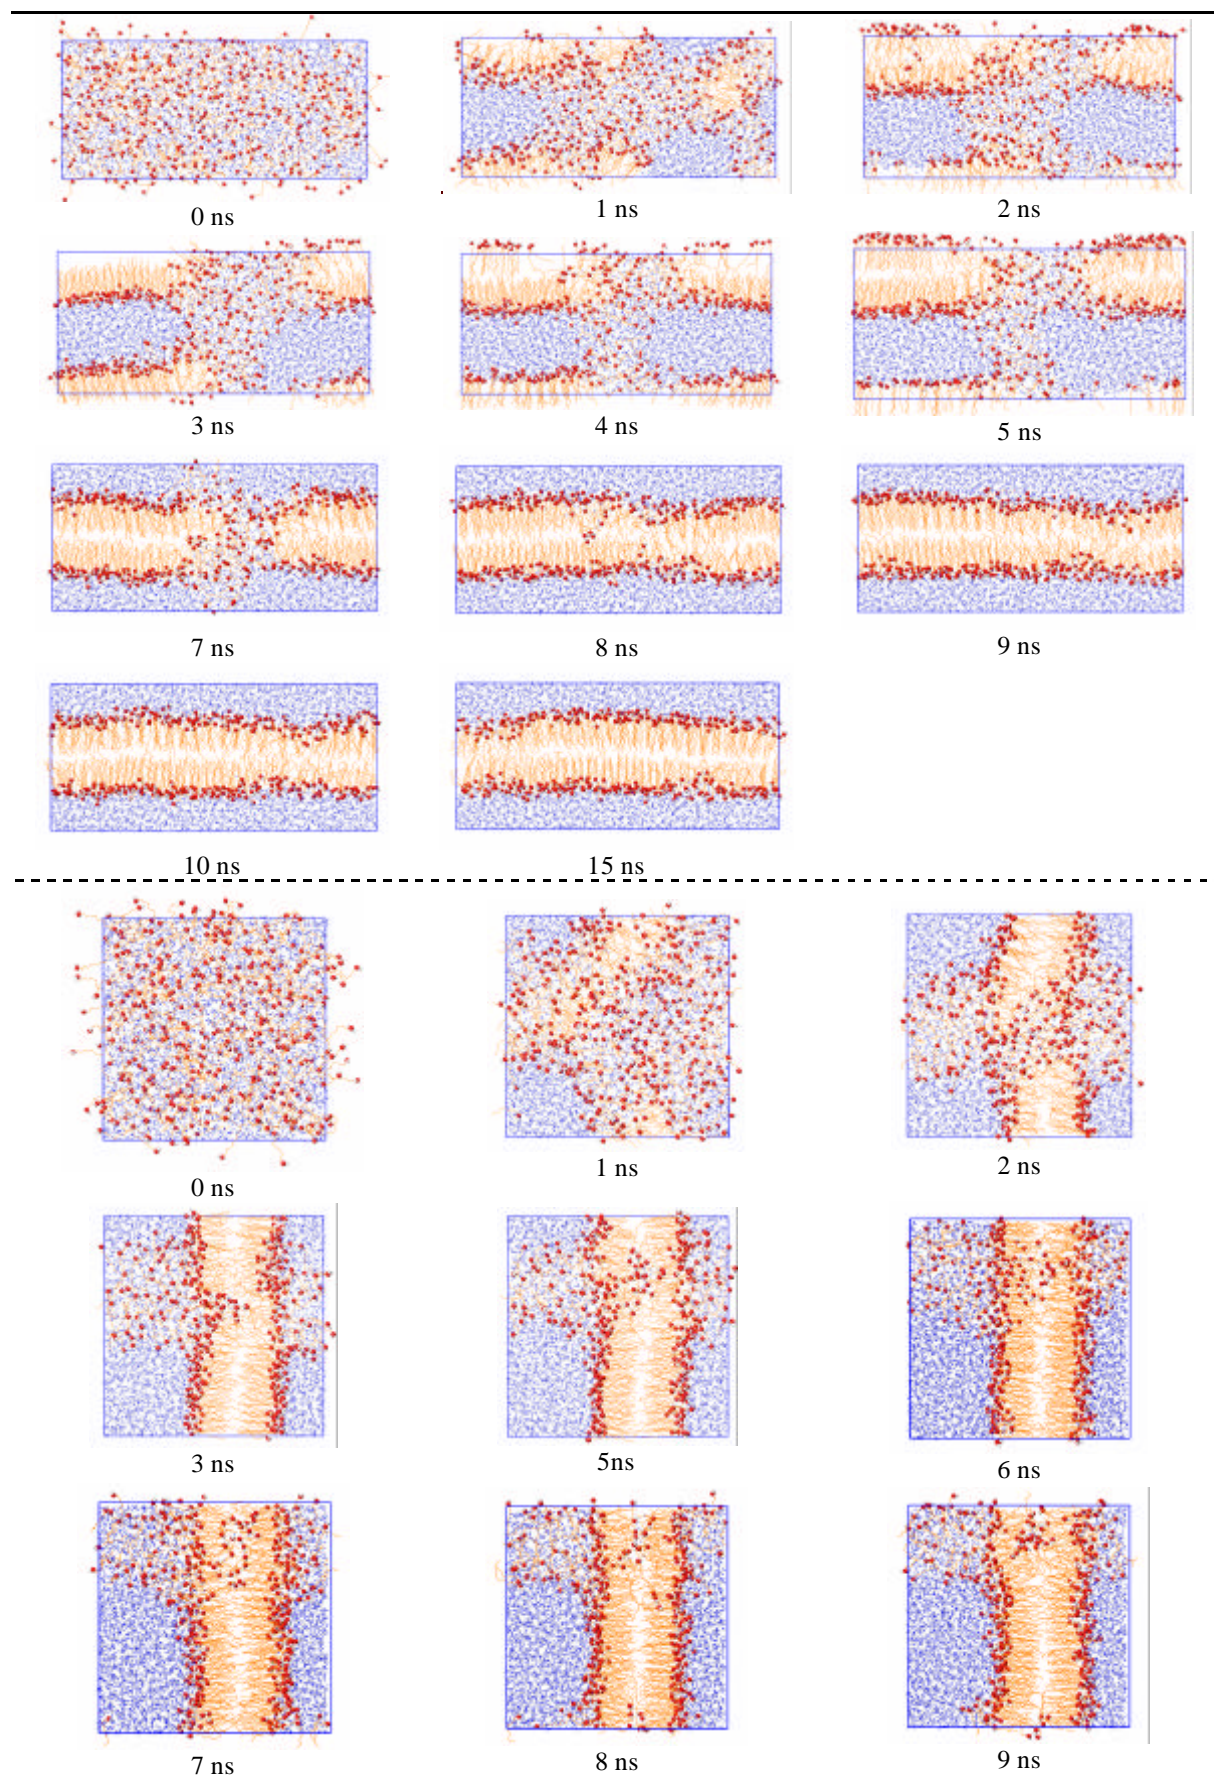

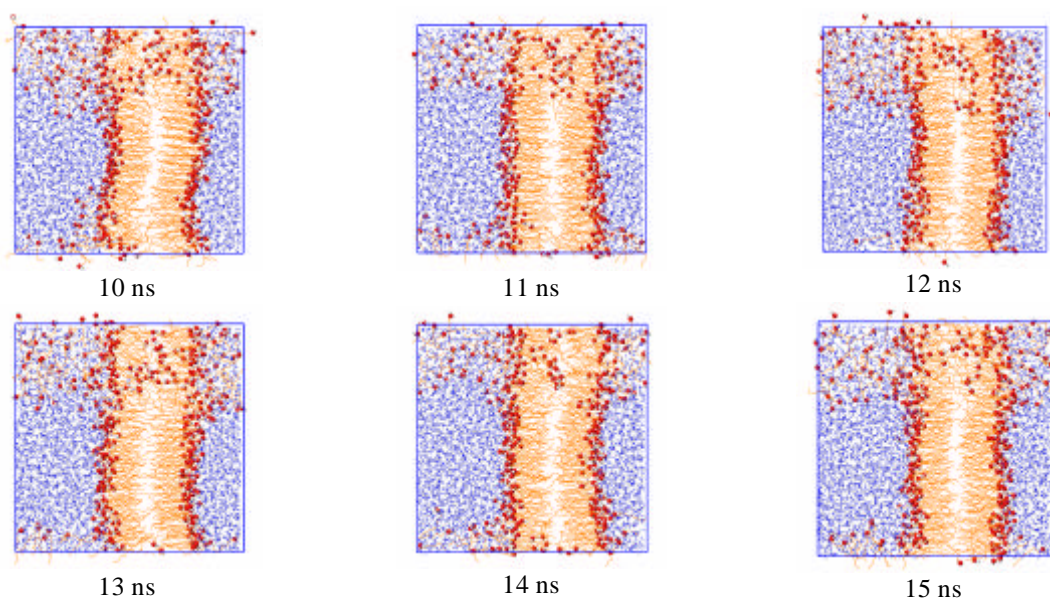

**Figure S5:** Phase separation of randomly mixed 50:50 octanol – water liquids. Snapshots at selected times in the "rectangular" box and in the cubic box.



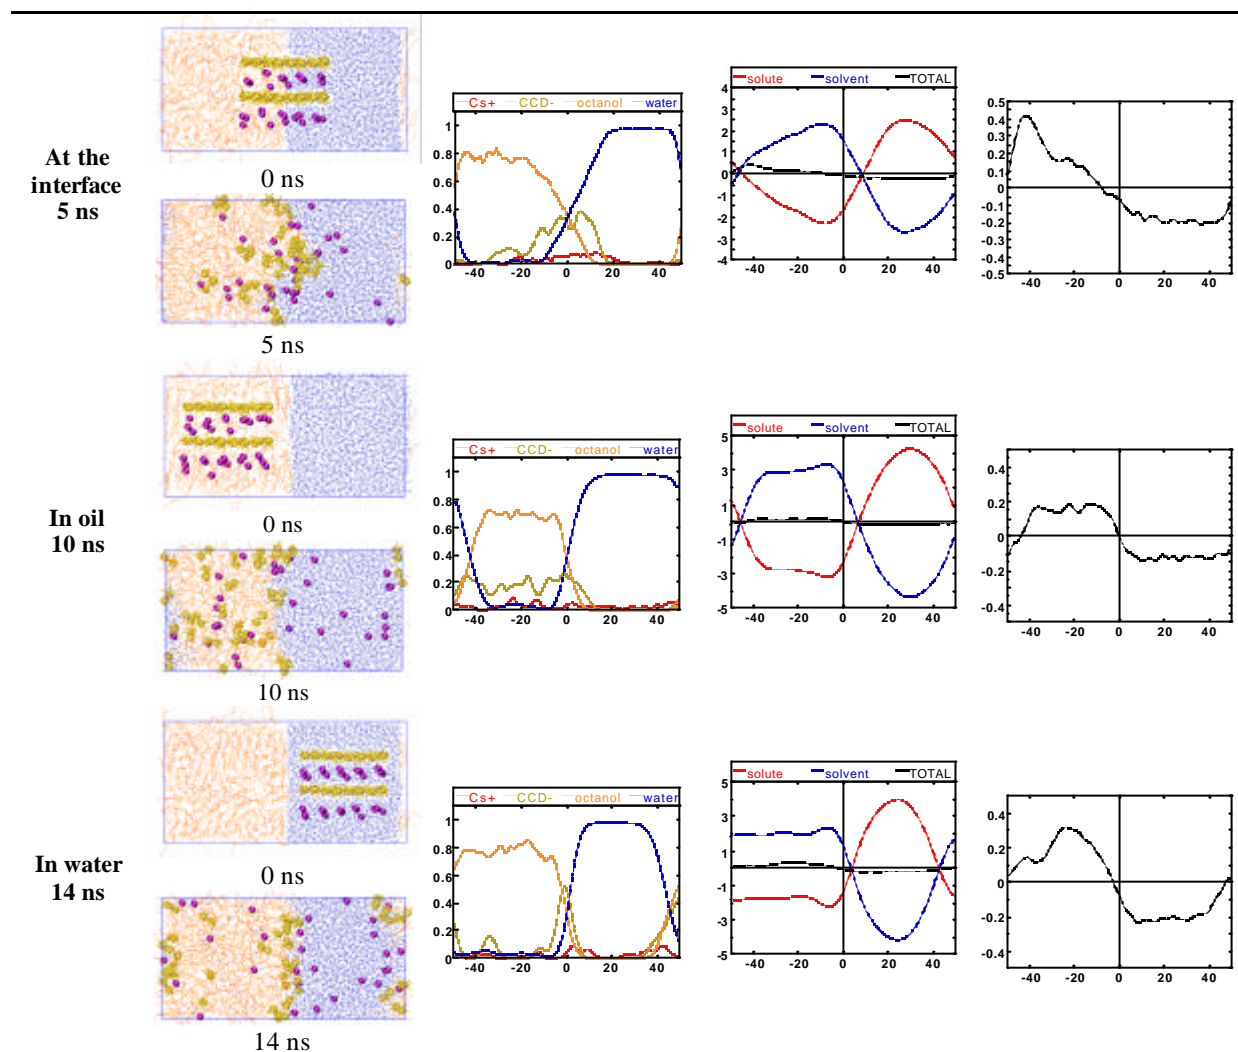

**Figure S6:** 30 CCD<sup>-</sup> Cs<sup>+</sup> ions at the octanol – water interface, simulated with the ions initially at the interface, or in octanol, or in water. Initial and final views, average densities as a function of the z-position, electrostatic potentials resulting from the solute (red), the solvents (blue) and their sum (black).

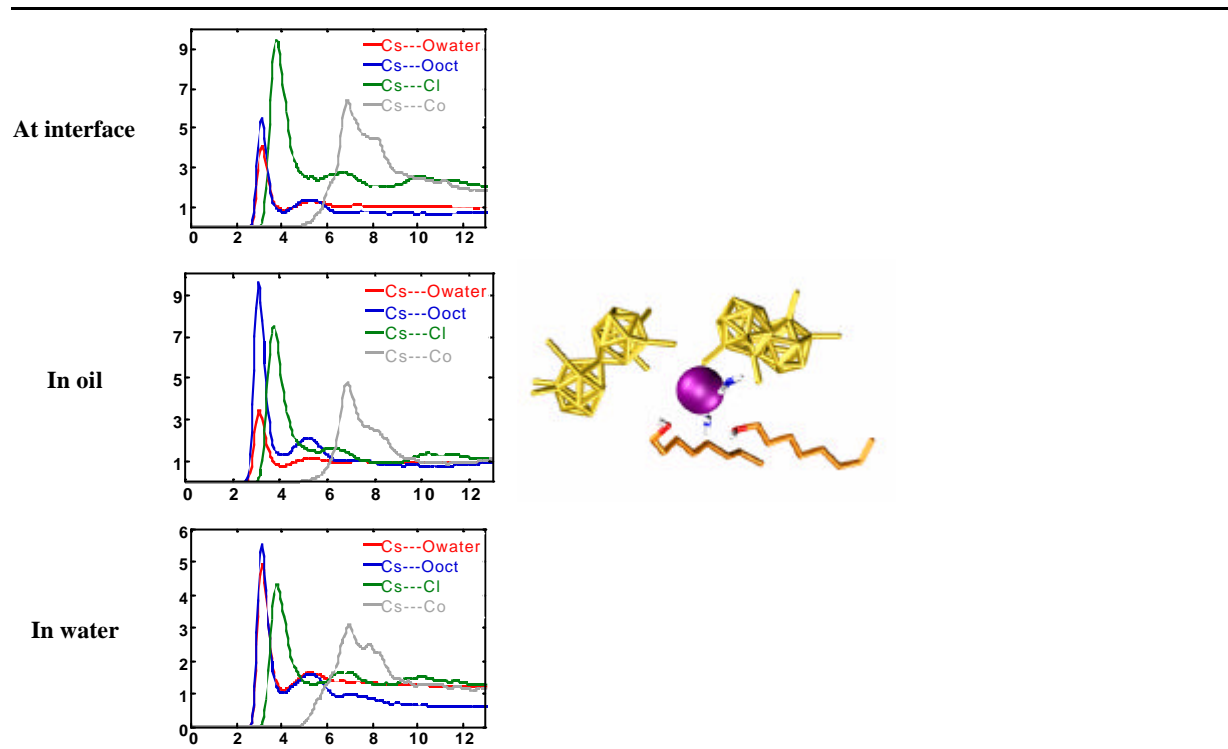

**Figure S7:** 30 CCD<sup>-</sup> Cs<sup>+</sup> ions at the octanol – water interface, simulated with the ions initially at the interface, or in octanol, or in water. Average RDF's around all Cs<sup>+</sup> atoms and snapshot of Cs<sup>+</sup> in octanol.

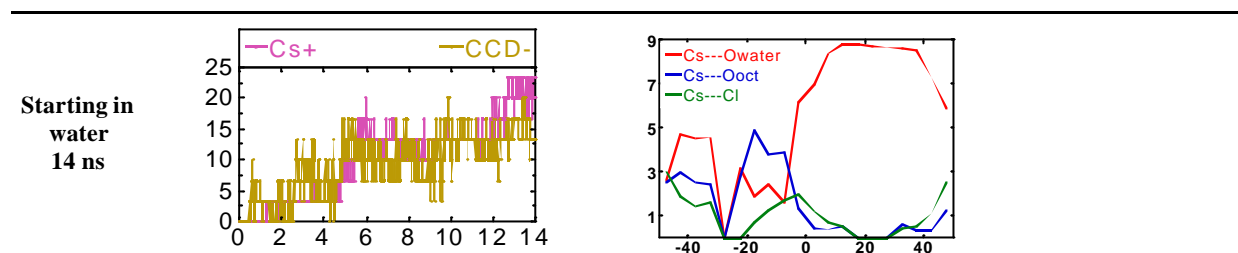

**Figure S8:** Simulation of 30 CCD<sup>-</sup> Cs<sup>+</sup> ions at the octanol – water interface, starting with all ions in water. Percentage of CCD<sup>-</sup> and Cs<sup>+</sup> ions found in "bulk octanol" as a function of time. Average number of O(H<sub>2</sub>O) (red), O(octanol) (blue) and Cl(CCD) (green) atoms around Cs<sup>+</sup> cations as a function of their z-position.

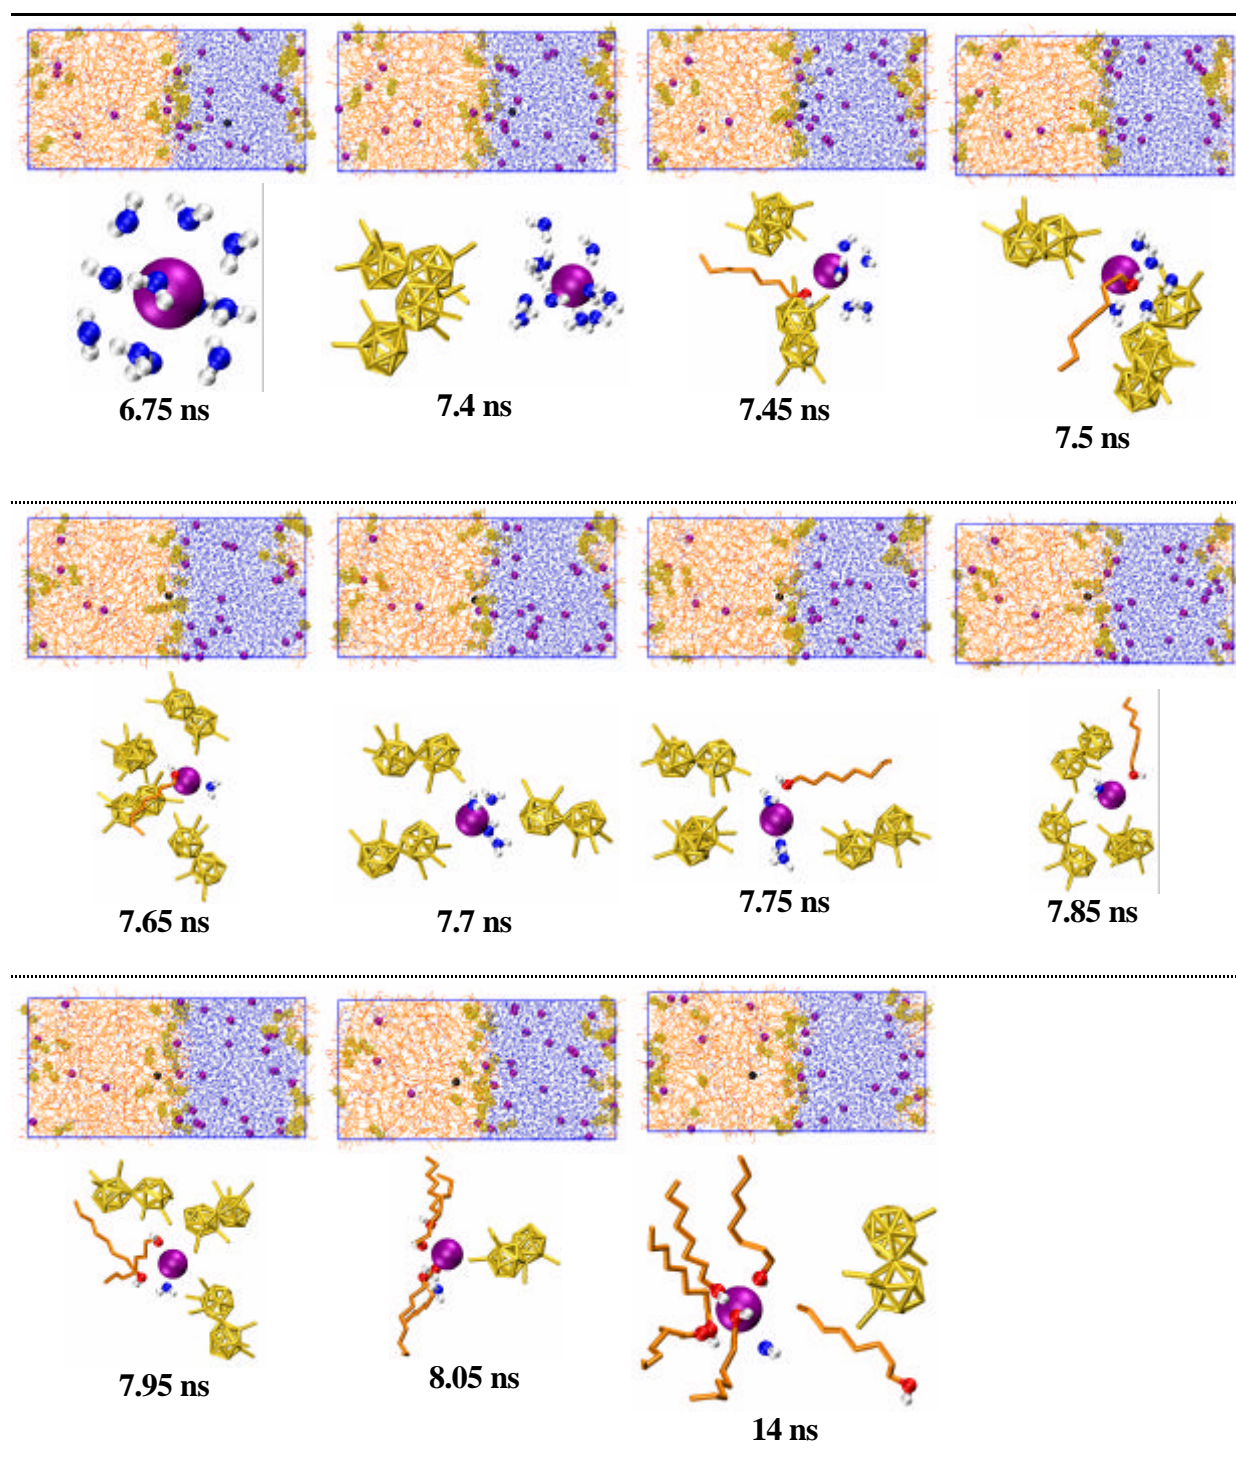

**Figure S9:** 30  $\text{CCD}^- \text{Cs}^+$  ions at the octanol – water interface, simulated with the ions initially in water. Typical snapshots of the solvent box and of a selected  $\text{Cs}^+$  ion (colored in black in the solvent box) that migrates from water to octanol.

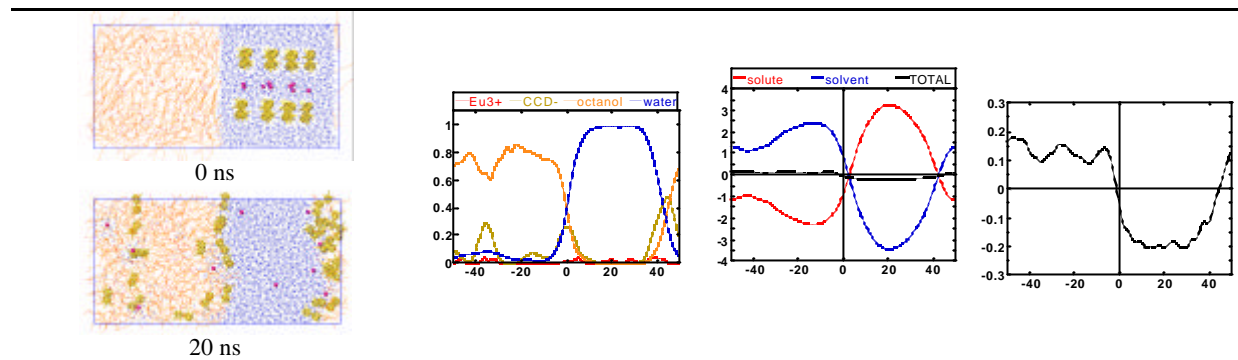

**Figure S10:** 30 CCD<sup>-</sup> and 10 Eu<sup>3+</sup> ions at the octanol – water interface. Initial and final views, average densities as a function of the z position, electrostatic potentials resulting from the solute (red), the solvents (blue) and their sum (black).

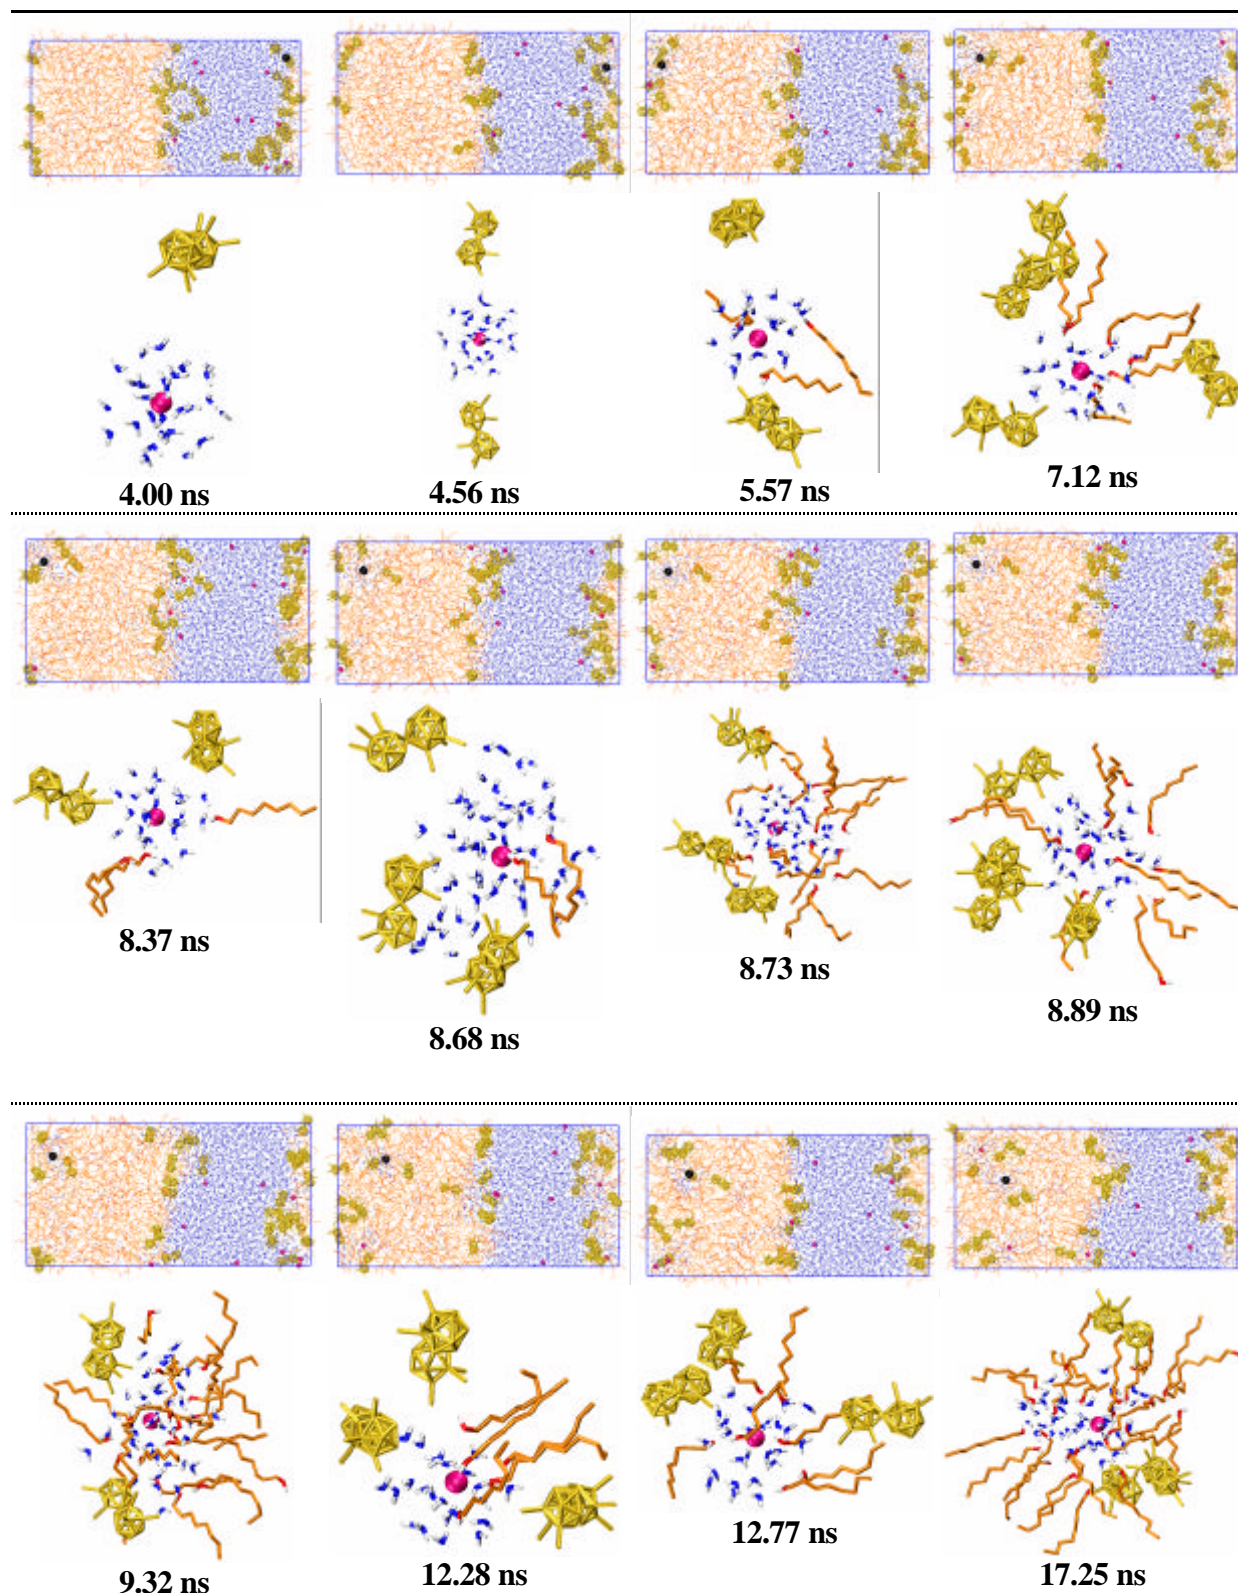

**Figure S11:** 30 CCD<sup>-</sup> and 10 Eu<sup>3+</sup> ions at octanol – water interface. Typical snapshots of the solvent box and of a selected Eu<sup>3+</sup> ion (colored in black in the solvent box) that migrates from water to octanol.

Octanol – water Interface

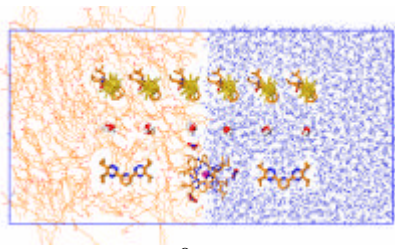

0 ns

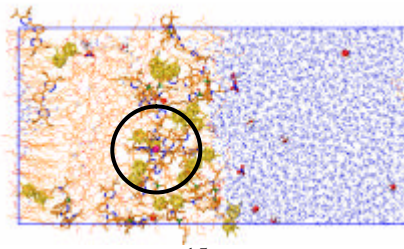

15 ns

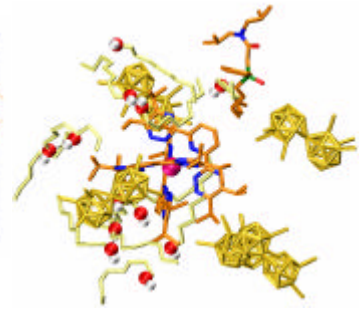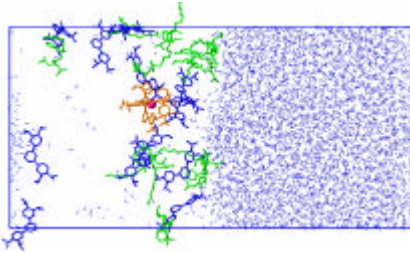

BTP (blue) + CMPO (green) (15 ns)

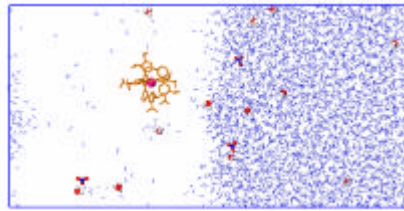

H<sub>3</sub>O<sup>+</sup> + NO<sub>3</sub><sup>-</sup> (15 ns)

Octanol – water Interface DEMIX

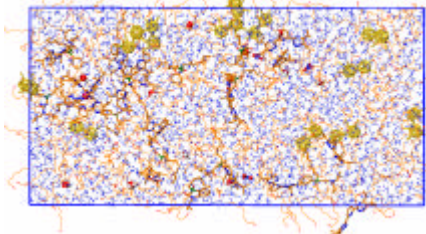

0 ns

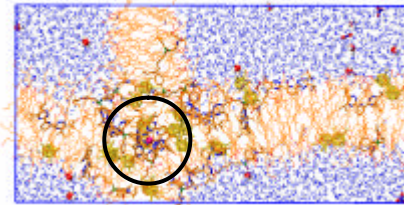

15 ns

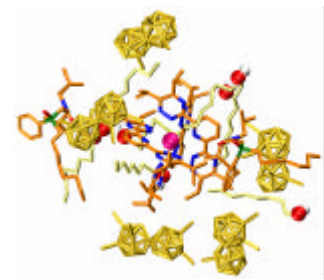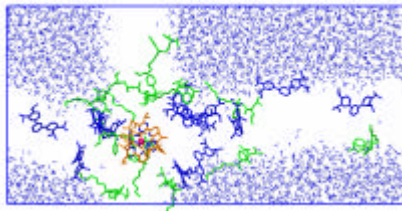

BTP (blue) + CMPO (green) (15 ns)

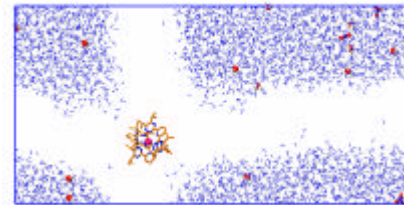

H<sub>3</sub>O<sup>+</sup> + NO<sub>3</sub><sup>-</sup> (15 ns)

Octanol – water Interface DEMIX CUBIC

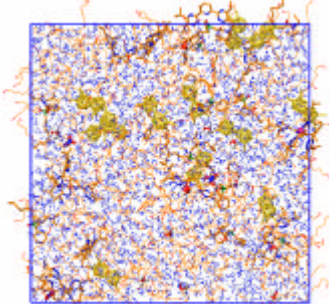

0 ns

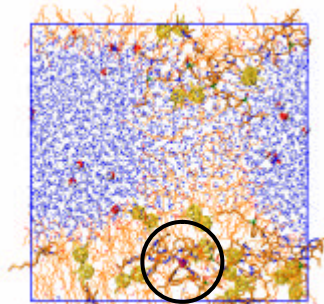

15 ns

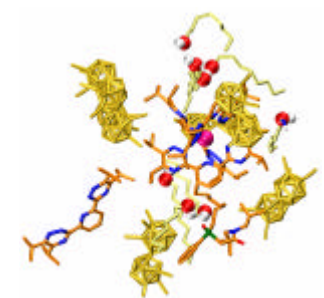

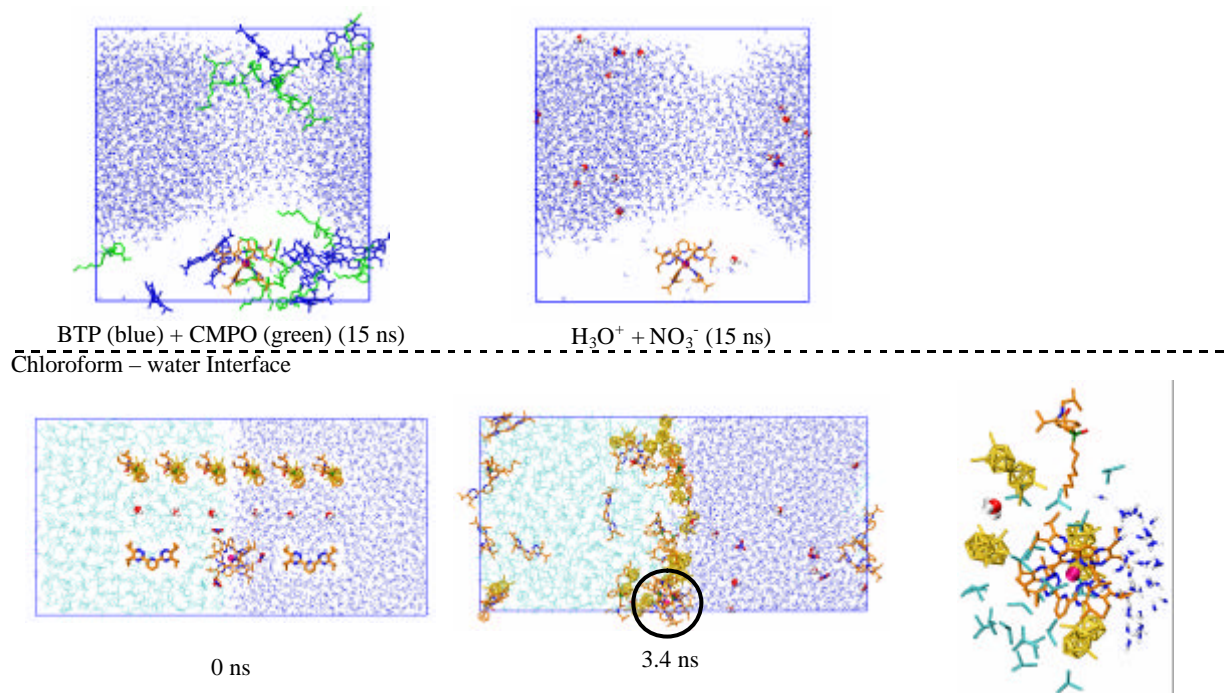

**Figure S12:** The  $\text{Eu}(\text{BTP})_3^{3+}$ , 3  $\text{NO}_3^-$  complex in the presence of 12 CMPO and 12 BTP ligands plus 12  $\text{CCD}^-$   $\text{H}_3\text{O}^+$  ions. From top to bottom: the octanol – water interface, simulated from juxtaposed liquids (top), from mixed liquids in a rectangular box (middle), or in a cubic box (bottom), and the chloroform – water interface. Initial and final views, with typical snapshots of the  $\text{Eu}(\text{BTP})_3^{3+}$  complex "extracted" to the octanol phase, or adsorbed at the chloroform interface. At the octanol – water interface, the distribution of CMPO, BTP,  $\text{H}_3\text{O}^+$  and  $\text{NO}_3^-$  are also displayed (octanol is not shown for clarity purpose).



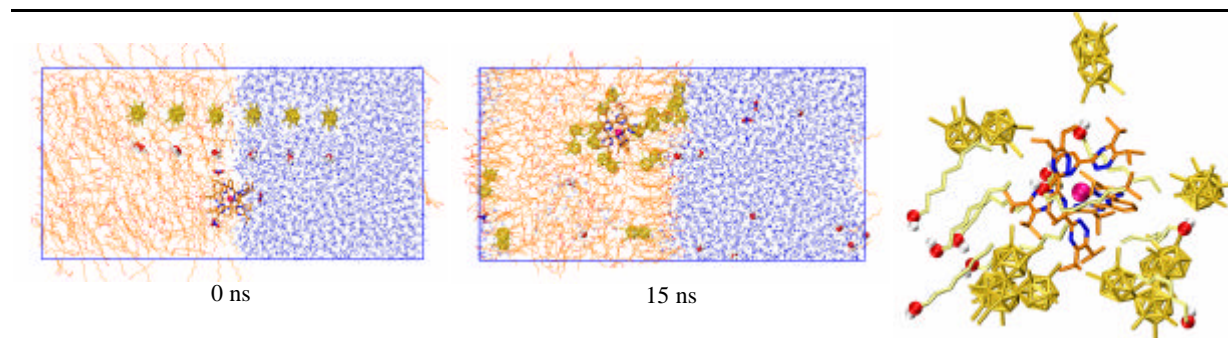

**Figure S13:** The  $\text{Eu}(\text{BTP})_3^{3+}$ , 3  $\text{NO}_3^-$  complex in the presence of 12  $\text{CCD}^- \text{H}_3\text{O}^+$  ions at the octanol – water interface. Initial and final views of the solvent box and zoom of the  $\text{Eu}(\text{BTP})_3^{3+}$  complex "extracted" to the octanol phase.

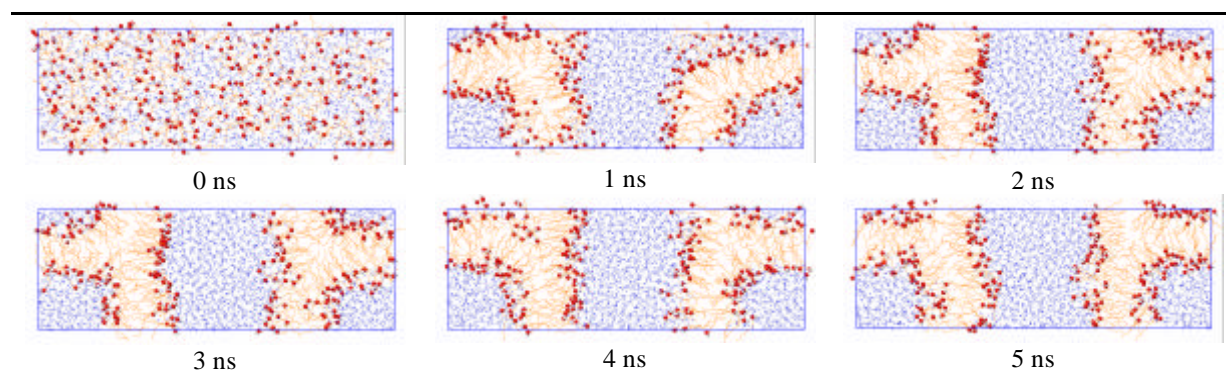

**Figure S14:** Snapshots of the phase separation of a "random" octanol – water 50:50 mixture (256  $\text{H}_2\text{O}$  plus 2048 octanol molecules) at 300K, as in the work of R. L. Napoleon and P. B. Moore (*J. Phys. Chem. B*, 2006, **110**, 3666-3673). Our final box size is 35 x 35 x 105  $\text{\AA}^3$ .
